# Supplementary material for: A Novel DNA Methylation-Based Signature Can Predict the Responses of MGMT Promoter Unmethylated Glioblastomas to Temozolomide
Source: PubMed Central journal article supplement (PMC6776832; doi:10.3389/fgene.2019.00910), 2019-09-27
Supplement: DataSheet_1.pdf [file DataSheet_1.pdf]

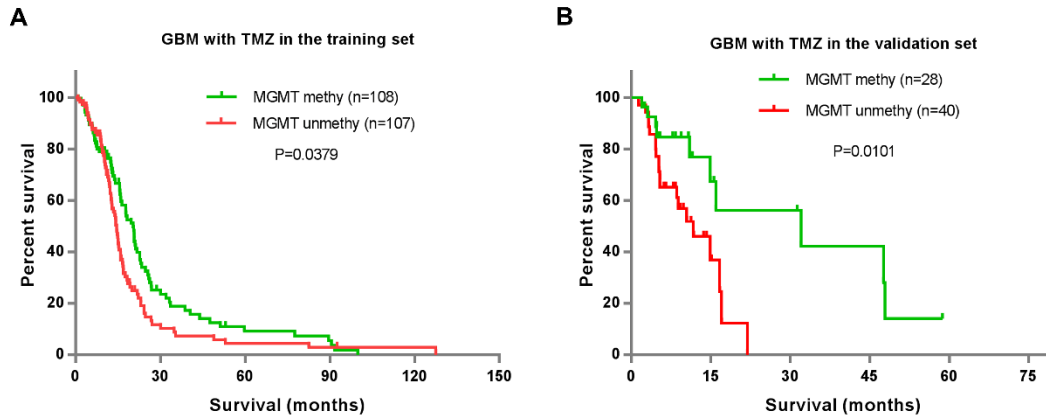

**Figure S1. The overall survival for TMZ treated patients with *MGMT* methylated or unmethylated GBM.**

A-B. Kaplan–Meier survival curves for TMZ treated GBM patients stratified by the *MGMT* methylation status in the training set (A) and the validation set (B), respectively.

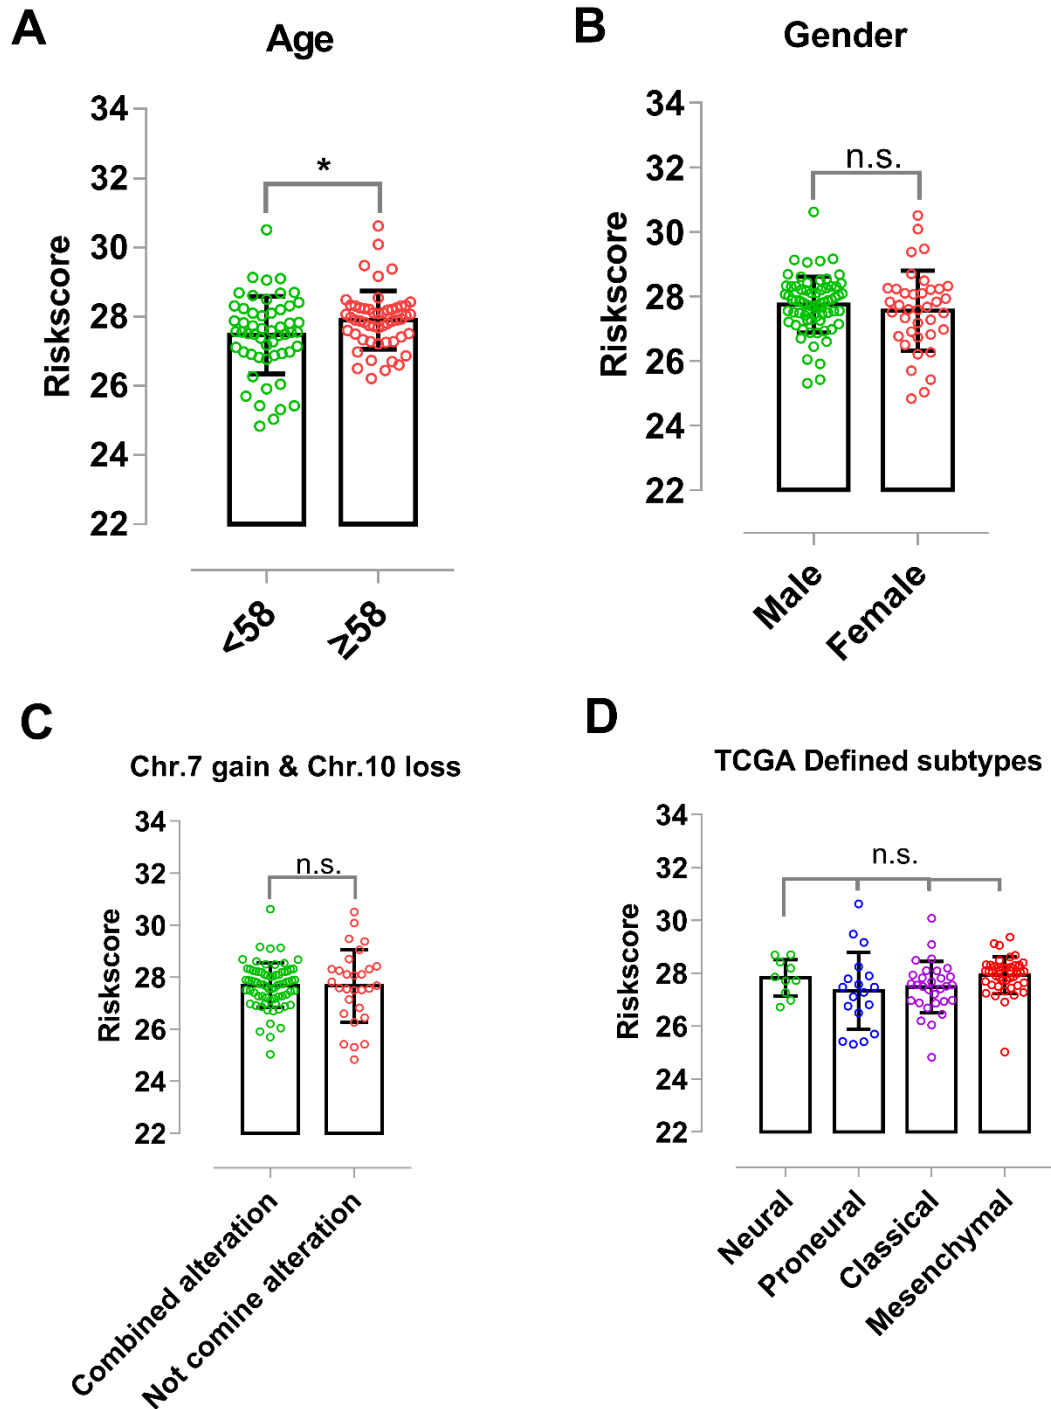

**Figure S2. Relationship between the risk score and clinicopathological features of TMZ treated *MGMT* un-methylated GBM.**

A-D Distribution of risk scores in the TMZ treated *MGMT* unmethylated GBM stratified by Age (A), Gender (B), Chromosome 7 gain and Chromosome 10 loss status (C), and TCGA defined subtypes (D).

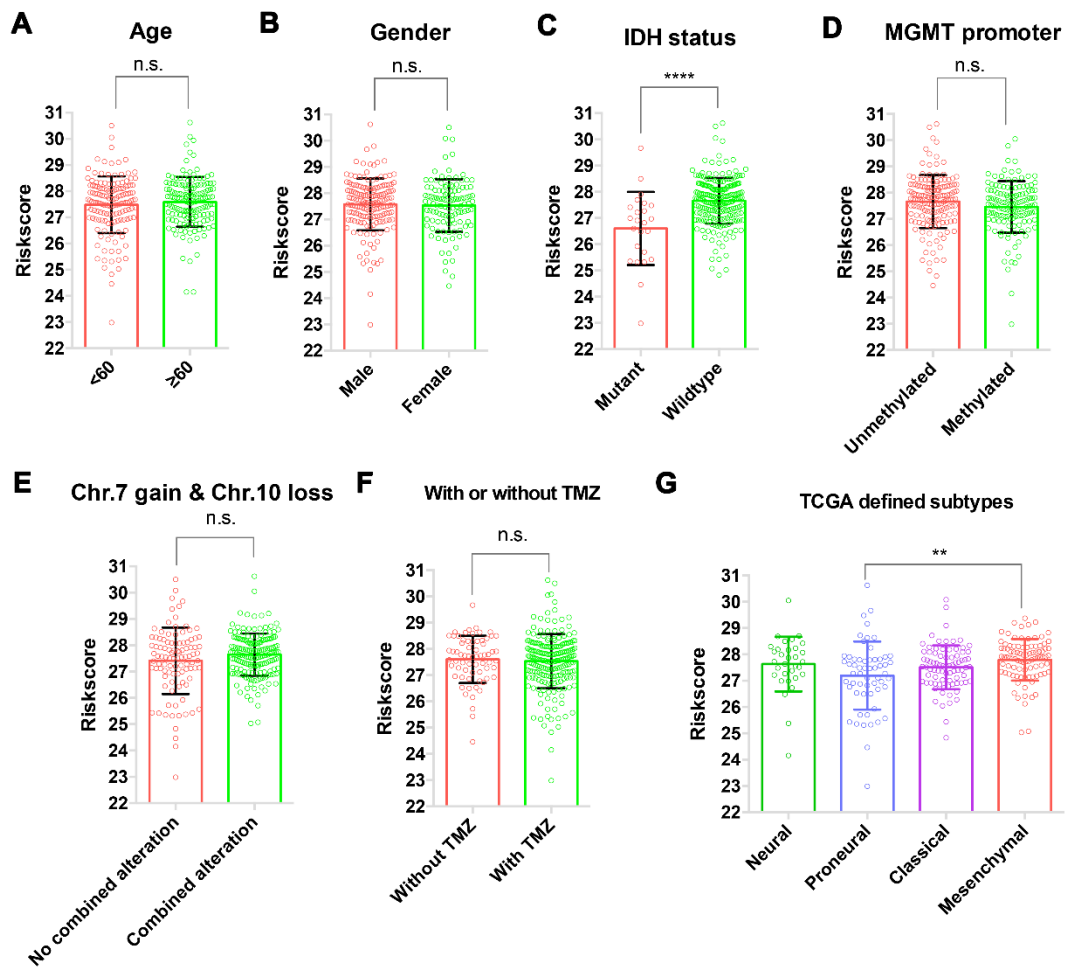

**Figure S3. Relationship between the risk score and the clinicopathological features of all GBM.** A-D Distribution of risk scores in the GBM by Age (A), Gender (B), IDH status (C), MGMT promoter methylation status (D), Chromosome 7 gain and Chromosome 10 loss status (E), with or without TMZ (F), and TCGA defined subtypes (G).
